# Supplementary material for: Disentangling environmental drivers of Subarctic dinocyst assemblage compositional change during the Holocene
Source: Copernicus journal article supplement (doi:10.5194/egusphere-2023-561), 2023-05-08
Supplement: Supplementary file 1 [file egusphere-2023-561-supplement.pdf]

## Supplementary material

**Dataset S1:** Dataset containing matrices of the local calibration dataset (n=421) including coordinates, taxa abundances and tested environmental variables (Excel-file). The dataset will be available at PANGAEA with publication.

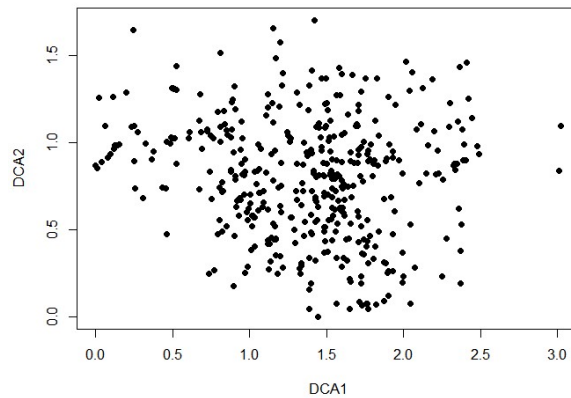

**Figure S2:** DCA analysis plot for the local dataset.

**Script S3:** R-Script explaining the variable selection procedure (manual forward selection) extricating independent variables in the local dataset (PDF-file). The script will be available on ZENODO with publication.

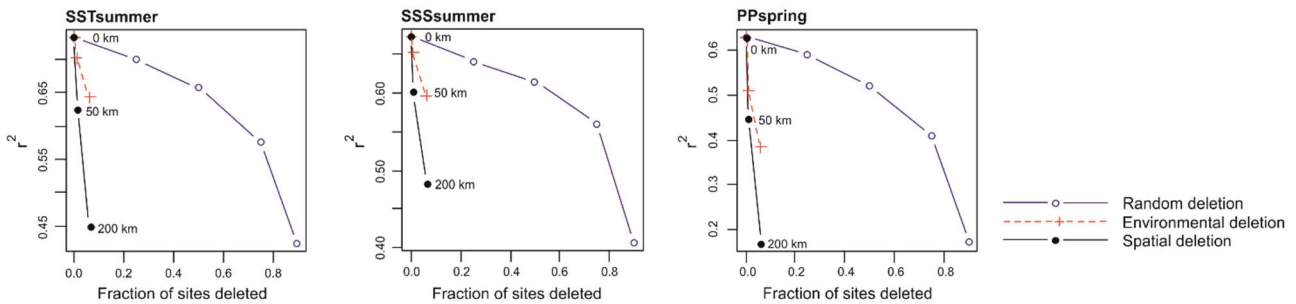

**Figure S4:** Spatial autocorrelation test. The effect of site deletion on the performance of a test transfer function (leaving-one-out  $r^2$  between observed and predicted values), comparing random site deletion, neighbourhood deletion (testing three distances) and environmental deletion for non-redundant variables. Note that the scale for  $r^2$  is different for each tested variable depending on its performance at the beginning.

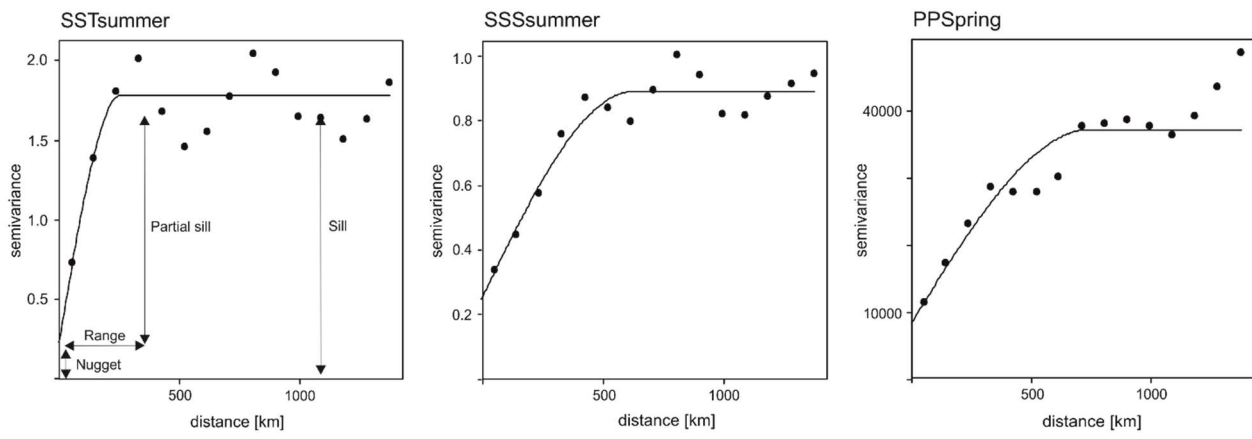

**Figure S5:** Variogram plots for the estimation of  $h$  in the  $h$ -block cross-validation.

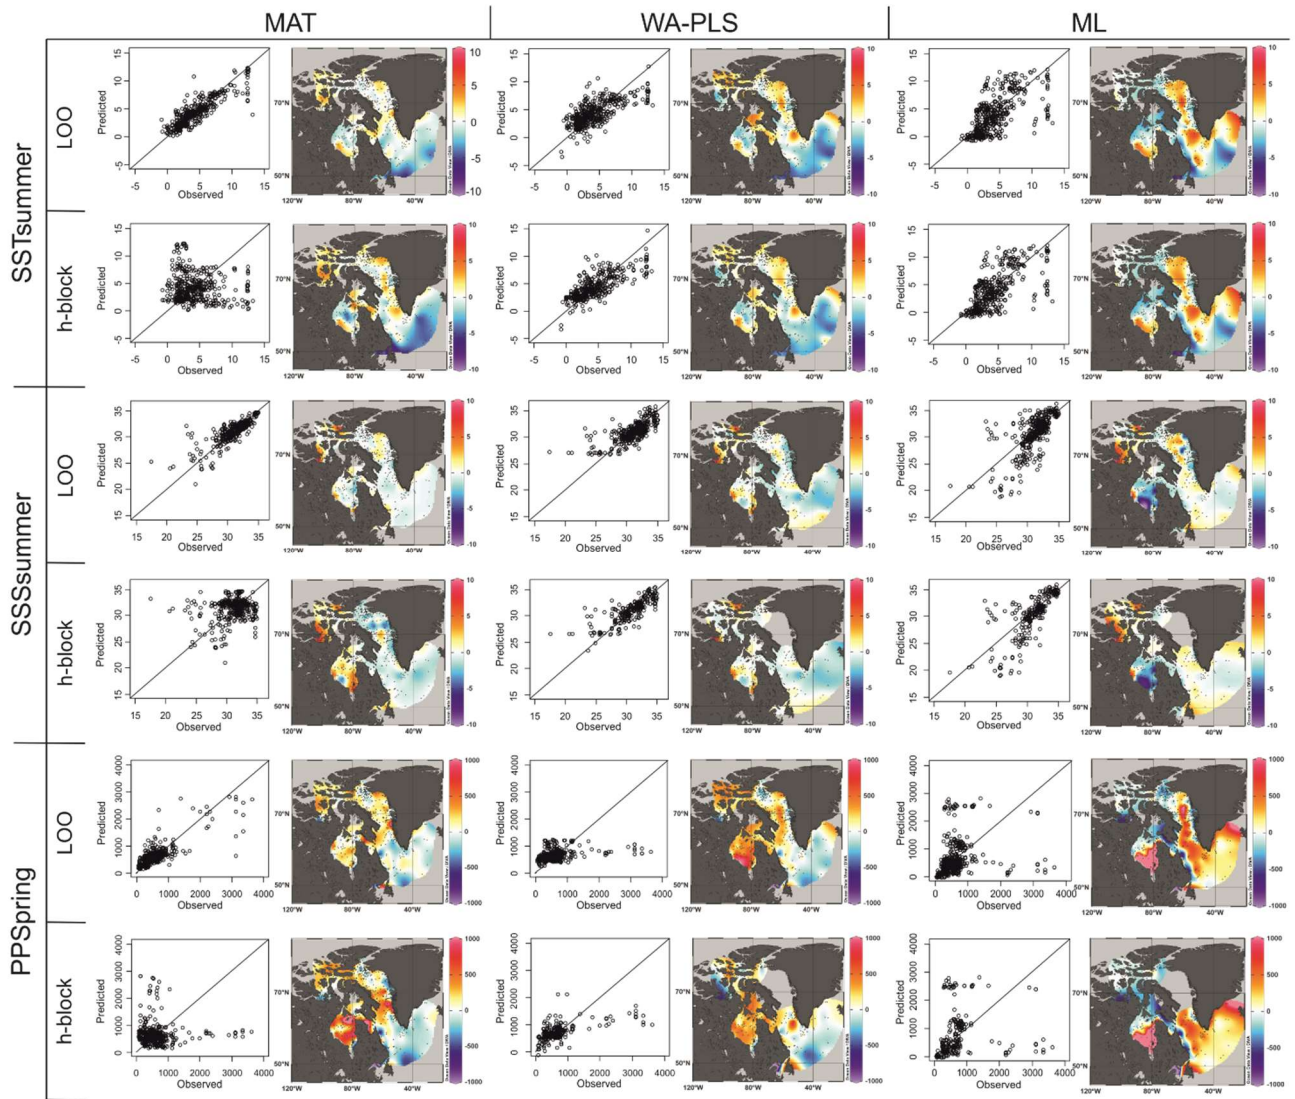

**Figure S6:** Residuals from leave-one-out and h-block cross-validation for all tested transfer functions shown in cross-plots of predicted vs. observed environmental variables and in maps, indicating overestimation through red colours and underestimation through blue colours. White colour indicates none or little residuals.

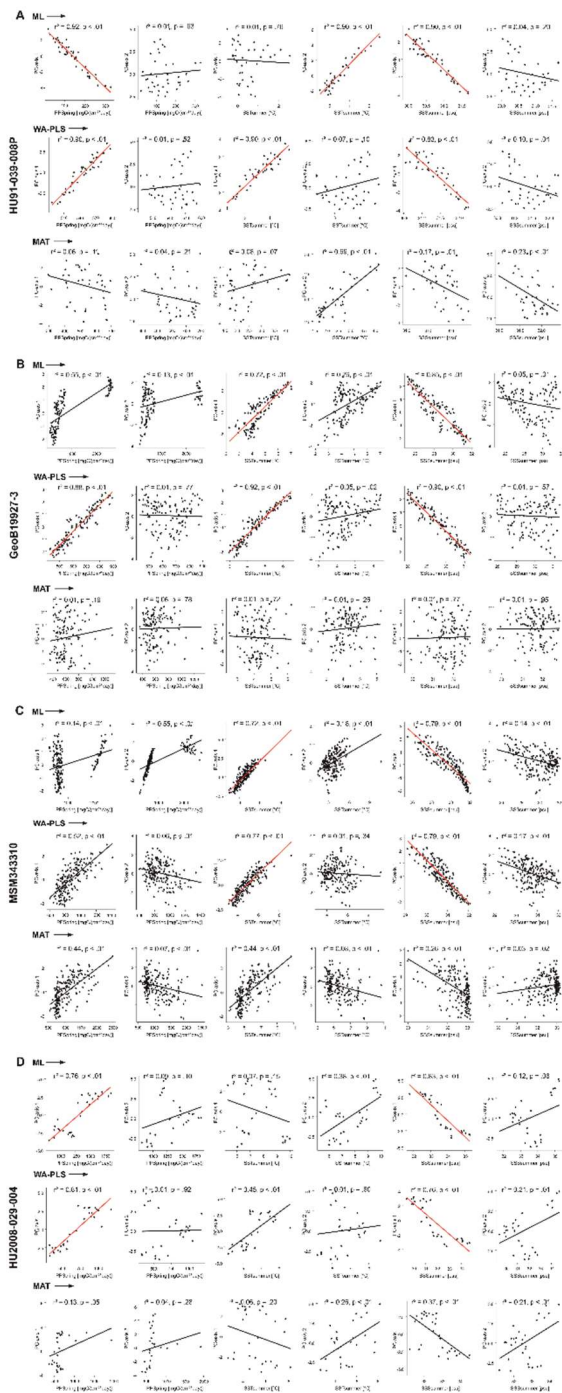

**Figure S7:** Cross-correlation plots of downcore reconstructions vs PC-axis 1 and PC-axis 2 for all four cores from north to further south. a) HU91-039-008P, b) GeoB19927-3, c) MSM343310 and d) HU2008-029-004. Significant correlations with  $p \leq .01$  and  $r^2 \geq 0.70$  with red correlation line.
